1       **Cryo-electron microscopy structure of the SADS-CoV spike glycoprotein**  
2       **provides insights into an evolution of unique coronavirus spike proteins**

3

4       Hongxin Guan<sup>1,3</sup>, Youwang Wang<sup>2,4</sup>, Abdullah F.U.H. Saeed<sup>1</sup>, Jinyu Li<sup>5</sup>, Vanja  
5       Perčulija<sup>1</sup>, Yu Li<sup>1</sup>, Ping Zhu<sup>2,4\*</sup>, and Songying Ouyang<sup>1,2,3\*</sup>

6

7

8       <sup>1</sup>The Key Laboratory of Innate Immune Biology of Fujian Province, Provincial  
9       University Key Laboratory of Cellular Stress Response and Metabolic Regulation,  
10       Biomedical Research Center of South China, Key Laboratory of OptoElectronic  
11       Science and Technology for Medicine of Ministry of Education, College of Life  
12       Sciences, Fujian Normal University, Fuzhou 350117, China.

13       <sup>2</sup>National Laboratory of Biomacromolecules, CAS Center for Excellence in  
14       Biomacromolecules, Institute of Biophysics, Chinese Academy of Sciences, Beijing  
15       100101, China.

16       <sup>3</sup>Laboratory for Marine Biology and Biotechnology, Pilot National Laboratory for  
17       Marine Science and Technology (Qingdao), Qingdao 266237, China.

18       <sup>4</sup>University of Chinese Academy of Sciences, Beijing 100049, China.

19       <sup>5</sup>College of Chemistry, Fuzhou University, Fuzhou 350116, China

20

21       Contributed equally to this work with: Hongxin Guan, Youwang Wang.

22       \*Correspondence: [ouyangsy@fjnu.edu.cn](mailto:ouyangsy@fjnu.edu.cn) (SO) or [zhup@ibp.ac.cn](mailto:zhup@ibp.ac.cn) (PZ)

23

24

25

26

27 **Abstract**

28 The outbreak of a novel betacoronavirus (SARS-CoV-2) has aroused great  
29 public health concern. As a new coronavirus which was responsible for a  
30 large-scale outbreak of fatal disease in piglets in China, swine acute diarrhea  
31 syndrome coronavirus (SADS-CoV) originated from the same genus of  
32 horseshoe bats (*Rhinolophus*) as SARS-CoV and possesses a broad species  
33 tropism. In addition to human cells, it can also infect cell lines from diverse  
34 species. Given the importance of the spike glycoprotein (S) protein in viral  
35 entry and host immune responses, here we report the cryo-EM structure of the  
36 SADS-CoV S in the prefusion conformation at a resolution of 3.55 Å. Our  
37 studies reveal that SADS-CoV S structure takes an intra-subunit quaternary  
38 packing mode where the NTD and CTD from the same subunit pack together  
39 by facing each other. The comparison of NTD and CTD with that of the other  
40 four genera gives the suggestion of the evolutionary procedure of the  
41 SADS-CoV S. Moreover, SADS-CoV S has several characteristic structural  
42 features, i.e., more compact architecture of S trimer, masking of epitopes by  
43 glycan shielding, which may facilitate to viral immune evasion. These data  
44 provide new insights into the evolutionary relationships of SADS-CoV S and  
45 would deepen our understanding of their structural and functional diversity  
46 which will facilitate to vaccine development.

47

## 48 Introduction

49 The risk of significant coronavirus (CoV) epidemics in the previous two  
50 decades comprising Severe Acute Respiratory Syndrome (SARS) in 2003,  
51 Middle East Respiratory Syndrome (MERS) in 2012, Swine Acute Diarrhea  
52 Syndrome (SADS) in 2017, and the latest 2019 outbreak of human-infecting  
53 virulent strain of severe acute respiratory syndrome coronavirus 2  
54 (SARS-CoV-2) have claimed a large number of human lives and livestock.  
55 They have shared features of pathogenicity, origin from bats [1-3]. Generally,  
56 CoVs viral particles have a crown-like shape from which they are termed after.  
57 The genome of CoV is the second largest of all RNA viruses containing a  
58 positive-sense, 27–32 kb in length single-strand RNA (+ssRNA) [4]. CoVs  
59 have a place with the subfamily *Coronavirinae*, family *Coronaviridae*, order  
60 *Nidovirales*, and grouped into four genera for example alpha ( $\alpha$ ), beta ( $\beta$ ), both  
61 CoVs infecting mammals, gamma ( $\gamma$ ) CoVs infecting birds, and delta ( $\delta$ ) CoVs  
62 infecting mammals and birds [5]. CoVs bring about subclinical or respiratory  
63 syndrom, central nervous system (CNS) infections, gastrointestinal ailments in  
64 humans, and animals [6-8]. These infections are accountable for 30% of the  
65 respiratory illnesses, atypical pneumonia [3, 9] and show a tendency for  
66 interspecies transmission which happened rather often during CoV evolution  
67 and shaped the diversity of CoVs [10].

68 Porcine CoVs are chief health concerns of the pigs and are  
69 considerable enteric and respiratory infections causing agents of swine. A

70 novel CoV instigating swine acute diarrhea syndrome (SADS) emerged since  
71 August 2016. It is associated with HKU2-related *Rhinolophus* bat CoV with  
72 death rate up to 90% in piglets 5 days or younger in Guangdong territory pig  
73 breeding farms and accounted for the killing of around 25,000 piglets [11].  
74 SADS-CoV has a position with the class  $\alpha$ -CoVs, and it is enveloped +ssRNA  
75 virus [7, 12, 13]. The intracellular entry of SADS-CoV relies on a precise  
76 interaction amid virion and the host cell. The disease is initiated by the  
77 interplay of the viral particle with specific cell surface S trimmer [14].

78 CoVs from various genera display evident serotypes, for the most part,  
79 because of the dissimilarity of their envelope-anchored diversified S proteins.  
80 S protein is of around 1300 amino acids, has a place with class I viral  
81 combination protein, including SARS-CoVs, human immunodeficiency virus  
82 (HIV) envelop glycoprotein 160 (gp160), influenza virus haemagglutinin (HA),  
83 paramyxovirus F and Ebola virus glycoprotein [15]. The S protein includes  
84 three sections: a large ectodomain, a single-pass transmembrane anchor, and  
85 a small intracellular tail. The ectodomain comprises of a N-terminal  
86 receptor-binding domain (RBD) viral attachment and entry subunit S1 (~700  
87 amino acids) forming a crown like structure and a membrane-fusion C-terminal  
88 subunit S2 (~600 amino acids) leading to an assembly of architecture i.e., CTD  
89 is sandwiched by its NTD [16]. In addition, CTDs with assistance of S1 retain a  
90 “lying down” inactive state which transits to “stand up” active state on the S  
91 trimer for efficient receptor binding [17-20].

92           The envelope trimeric S protein is vital for identifying host tropism and  
93 transmission limit. It intercedes receptor binding to approach host cell cytosol  
94 utilizing acid-dependent proteolytic cleavage of S protein by a cathepsin,  
95 TMPRRS2, or additional protease ensued by fusion of the membrane [21, 22].  
96 CoVs utilize an assortment of receptors and triggers to enact fusion [14].  
97 Receptor binding is fundamental to host-pathogen interaction and  
98 pathogenesis. Numerous  $\alpha$ -CoVs, for example, human CoV (HCoV-229E),  
99 utilize aminopeptidase N (APN) as its receptor, SARS-CoV, HCoV-NL63, and  
100 SARS-CoV-2 employ angiotensin-converting enzyme 2 (ACE2), and  
101 MERS-CoV ties to dipeptidyl-peptidase 4 (DPP4). However, receptor  
102 investigation of SADS-CoV demonstrated that none of the known CoV  
103 receptors, i.e., APN, ACE2, and DPP4, is crucial for cell entry that shows the  
104 divergence and significance of S protein in SADS-CoV infection [11]. Along  
105 these lines, contemplating the clinical indications of this advancing virus, there  
106 is an essential need for primary and practical comprehension of SADS-CoV to  
107 additionally expand mechanisms of viral entry and pathogenesis in pigs.

108           Notwithstanding the significance of the S protein in viral entry and host  
109 immunity, high-resolution structural details of this enormous macromolecular  
110 machine have been hard to acquire. In this study, a cryo-EM structure of  
111 SADS-CoV S glycoprotein at 3.55 Å resolution is determined. Correspondingly  
112 in the present investigation of SADS-CoV, we portrayed the general structure  
113 of the S protein and the organization of its structural components. In light of the

114 structures and functions of these essential components, we detail the  
115 evolutionary perspective of SADS-CoV S in comparison with S proteins from  
116 different CoV genera. In our study, SADS-CoV S forms a “lying down”  
117 conformation following transition from inactive to active state and ACE2 is not  
118 the receptor of SADS-CoV. The structural alignment suggests that SADS-CoV  
119 S is located between  $\alpha$ -CoV and  $\beta$ -CoV clade. Hence, our results extend the  
120 understanding of critical structural and evolutionary insights into SADS-CoV S  
121 comprising the CTD/RBD essential for receptor recognition and viral entry.  
122 This study provides the epidemiological and evolutionary information of this  
123 novel virus in China which is deteriorating economically important swine  
124 industry, and highlights the urgency to develop effective measures to control  
125 SADS-CoV.

126

127

128

## 129 **Results and discussions**

### 130 **Overall structure of SADS-CoV spike protein**

131 In order to investigate the role of SADS-CoV S in its invasion, we aimed to  
132 solve the high-resolution structure of SADS-CoV S. SADS-CoV S ectodomain  
133 was secretory expressed and purified from media of insect cells after 3 days of  
134 infection by baculovirus. A fusion peptide of General control protein GCN4 at  
135 the C-terminal end of S was used to promote the protein forms a trimer [23]  
136 (**Fig. 1A**). The size-exclusion chromatography (SEC) result showed that the  
137 protein sample is a trimer in solution and the purity more than 95% examined  
138 in SDS-PAGE analysis (**Fig. S1A, S1B**). The protein displayed high  
139 homogeneity in cryo-EM screening, and was then diluted to 0.63 mg ml<sup>-1</sup> for  
140 data collection. Cryo-EM micrograph movies were collected on a Gatan K2  
141 direct electron detector mounted on an FEI Titan Krios electron microscope  
142 (**Fig. S2**). Following reference-free 2D classification of the spike protein, we  
143 determined a three-dimensional structure of the SADS-CoV S trimer at 3.55 Å  
144 resolution judged by the gold-standard Fourier shell correlation (FSC) criterion  
145 of 0.143 (**Fig. 1B, 1C and Table 1**). The resolved atomic structure of prefusion  
146 SADS-CoV S ectodomain covers almost all of the key structure elements as  
147 shown in **Fig. 1A** except residues 81-101 of NTD and residues 999-1068 of  
148 HR-C (**Fig. 1D, Fig. S3**). Forty-five (15 on each subunit) N-linked glycans  
149 spread over the surface of whole S trimer with another 15 predicted but not  
150 observed. In addition, the protein trimer is stabilized by 30 pairs (10 on each

151 subunit) of disulfide bonds (**Fig. S4**). The S trimer shows a dome-like shape,  
152 with three S1 heads forming a crown-like structure and sitting on top of a  
153 trimeric S2 stalk (**Fig. 1D, 1E and Movie S1**). The trimer spike has a length of  
154 143.2 Å from S1 to S2 and a width of 111.3 Å and 61.4 Å at S1 and S2,  
155 respectively (**Fig. 1E**). Three S1-CTDs are located at the top center of the S  
156 trimer arranged as a small triangle, whereas three S1-NTDs are located on the  
157 lower and outer side of S1-CTDs arranged as a big triangle. This architecture,  
158 i.e., CTD sandwiched by its own NTD and the adjacent NTD, comes into being  
159 one side of the big triangle (**Fig. 1F**). The cleavage site of S1 and S2 subunits  
160 locates between residues 544 (Val) and 545 (Arg). The central helicase N  
161 (CH-N) and C (CH-C) of S2 from each subunit form a six-helix bundle in the  
162 core of S trimer. Heptad repeats N (HR-N) contains four helices connected by  
163 three loops locked between the S1 and S2 subunit at the outside of the S2  
164 stalk, while part of the HR-C is missed in the structure (**Fig. 1G**). Each  
165 monomeric subunit of S1 contains two major domains, S1-NTD and S1-CTD  
166 which are used to bind attachment sialic acid receptors or protein receptors  
167 and play a key role in the coronavirus entry, and two subdomains, SD1 and  
168 SD2 whose function are not very clear (**Fig. 1H-1I, Movie S1**).



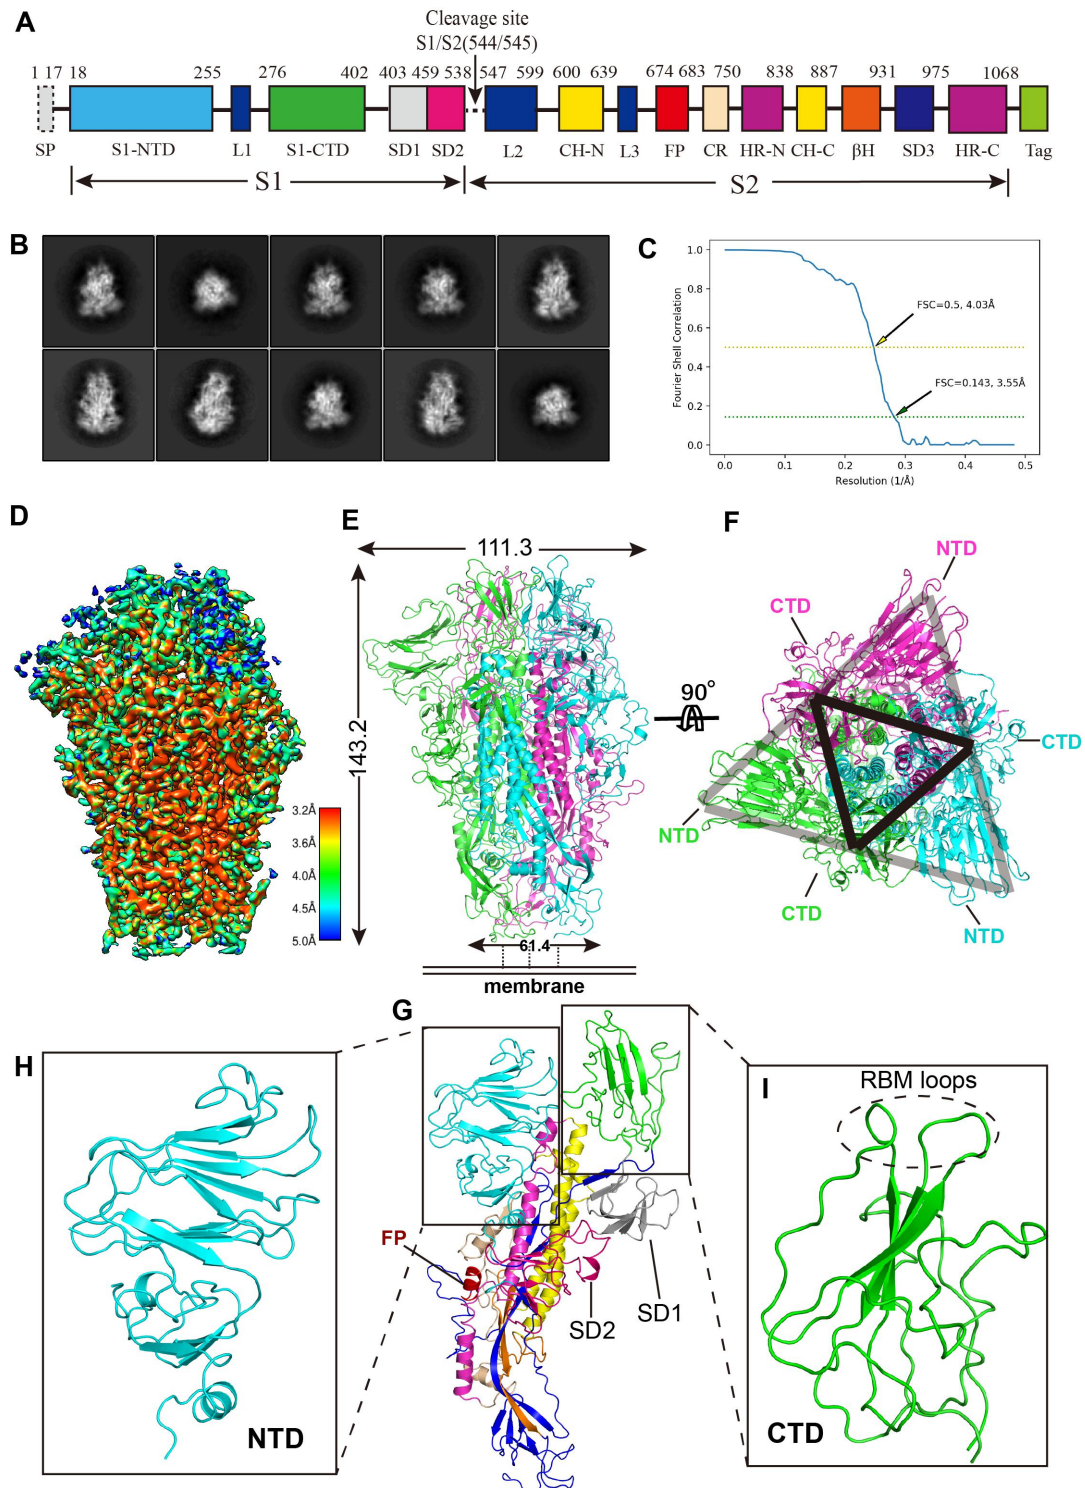

169

170 **Fig. 1. The 3.55 Å cryo-EM structure of SADS-CoV S in the prefusion**  
 171 **conformation.**

172 (A). Representative 2D class averages in different orientations of SADS-CoV S

173 trimer.

174 (B). Gold-standard FSC curves of SADS-CoV S. The resolution was  
175 determined to be 3.55 Å, and the 0.5 cut-off value is indicated by a horizontal  
176 yellow dashed line.

177 (C). Schematic drawing of SADS-CoV S. S1: receptor-binding subunit. S2:  
178 membrane-fusion subunit. NTD: N-terminal domain of S1. S1-CTD: C-terminal  
179 domain of S1. SD1-3: subdomain 1-3. FP: fusion peptide. CH-N and CH-C:  
180 central helices N and C. HR-N and HR-C: heptad repeats N and C. Tag: GCN4  
181 trimerization tag followed by His 6 tag.

182 (D). Final cryo-EM density map of SADS-CoV S colored according to the local  
183 resolution.

184 (E). Cryo-EM structure of SADS-CoV S in the prefusion conformation. Each of  
185 the monomeric subunit is colored in green, cyan and magenta, respectively.

186 (F). Same as (E) but the dome is rotated 90 degrees to show the top view of  
187 the trimer, the CTDs arrange as a small triangle and is indicated by a black  
188 triangle, and the two adjacent NTDs sandwich one CTD to form one side of a  
189 big triangle which is indicated by gray triangle.

190 (G). Cryo-EM structure of SADS-CoV S monomeric subunit. The structural  
191 elements are colored in the same way as in panel (A).

192 (H-I). Structures of S1-NTD (cyan) and S1-CTD (green), the putative RBM  
193 loops are indicated by a dashed cycle.

194

195 **Structural evolution of coronavirus spike protein**

196       The S from all the four different genera of the coronavirus packs a  
197 crown-like structure by three monomeric subunits which can be divided into  
198 two packing modes: the cross-subunit packing mode and the intra-subunit  
199 packing mode [24]. Our SADS-CoV S structure takes an intra-subunit  
200 quaternary packing mode where the NTD and CTD from the same subunits  
201 pack together by head to head. In SADS-CoV S, the three NTDs from different  
202 subunits are located at the vertices of the big triangle formed by the S1  
203 subunits and sandwich the CTDs to the center of the triangle. As a result, the  
204 putative receptor-binding moieties located on the top of CTDs are also  
205 wrapped at the center of the crown-like trimer (**Fig. 2A**). Accordingly, the  
206 geometry of SADS-CoV S resembles the prefusion structures of other  $\alpha$ - and  
207  $\delta$ -genera with the intra-subunit packing mode and is more compact than those  
208 of  $\beta$ - and  $\gamma$ -genera that use the cross-subunit packing mode (**Fig. 2A-2E**).  
209 Interestingly, although SADS-CoV belongs to the  $\alpha$ -genera, its spike protein  
210 doesn't have the domain 0 which is commonly found in other  $\alpha$ -genera CoVs,  
211 e.g., NL63-CoV and PEDV (**Fig. 2F-G**) [23].

212       Different from the receptor-binding inactive state of these structures  
213 whose all three CTDs in "lying down" positions (**Fig. 2A-2E**), previous study  
214 captured several  $\beta$ -CoVs S which contain one or two, even all three CTDs in  
215 "stand up" positions [17, 19, 20, 25, 26]. The engagement of the CTDs of  
216 SARS S trimer helps it to keep one or more CTDs in the "stand up" position  
217 and facilitate to the binding of ACE2 or neutralizing antibody. If all the three

218 CTDs are in the “lying down” position, it is not possible to bind ACE2 due to the  
219 partial binding sites are hidden and steric clashes between binding factors. This  
220 kind of conformation represents an inactive state (**Fig. 2H**). The CTDs in our  
221 structure keep a “lying down” state and the receptor-binding moieties are  
222 partially concealed. It needs to “stand up” on the spike trimer and release the  
223 steric clash for efficient receptor binding. The linker between CTDs and S1  
224 subdomains works as a hinge to facilitate the conformation change of CTDs  
225 from “lying down” to “stand up”, furthermore, transit the receptor-binding  
226 inactive state to active state (**Fig. 2F**).

227 It is noteworthy that stronger interactions in SARS-CoV spike trimer may  
228 obstruct conformational change and dissociation of S1-CTD in prefusion  
229 process (**Fig. S5**). Moreover, to probe the intrinsic mobility of the CTD/RBD of  
230 S trimer in the apo form (or to see whether the CTD/RBD of S trimer can  
231 spontaneously expand to an open state), we performed 2000 ns-long  
232 coarse-grained (CG) molecular dynamics (MD) simulations. A Martini [27] CG  
233 model was initially generated using the “lying down” state structure (**Fig. S6**).  
234 The center-of-mass distances between each two CTDs/RBDs across the  
235 simulations (**Fig. S6**) indicated that all the three CTDs/RBDs were stabilized in  
236 a “lying down” state similar to the structure observed in this study, i.e. the  
237 distance differences calculated from simulations and crystal structure were  
238 less than 5 Å. Although we did not observe apparent expanding of the  
239 CTDs/RBDs from a “lying down” state to a “stand up” state during the

240 simulations, it did not rule out the co-existence of the two states in the apo form.  
241 Because such large conformational transition may happen over long time  
242 scales (ms to s), far beyond the simulations performed here. Taken together,  
243 these simulation results may explain the homogeneity of SADS-CoV spike  
244 observed in our 3D classification and that the different S1-CTD conformations  
245 are invisible in our results (**Fig. 1B**).

246 For the NTDs, the core structure consists of two six-stranded antiparallel  
247  $\beta$ -sheet layers stacked together which takes the same galectin fold as human  
248 galectins and the NTDs from the other genera. Besides the core structure,  
249 NTD of SADS-CoV S1 also has a loop (residues 133-150) formed as a partial  
250 ceiling-like structure that resembles the partial ceiling of  $\gamma$ -coronavirus rather  
251 than the other  $\alpha$ - and  $\delta$ -coronavirus which do not have a ceiling-like structure,  
252 or the  $\beta$ -coronavirus which has a reinforced ceiling-like structure (**Fig. 2I-M**).  
253 Based on the structural similarity between the NTDs from four different CoVs  
254 genera, the sugar-binding site in SADS-CoV S1-NTD might also be located in  
255 the pocket formed between the core structure and the partial ceiling (**Fig. 2I**).  
256 Compared with other CoVs, the structure of the subdomain under the core  
257 domain of SADS-CoV S1-NTD has the same situation of the partial ceiling-like  
258 structure (**Fig. 2I-M**). Previous study gave the idea that NTDs from the four  
259 genera form an evolutionary spectrum in the order of  $\alpha$ -,  $\delta$ -,  $\gamma$ - and  $\beta$ -genera,  
260 with  $\alpha$ -CoVs NTD probably being the most ancestral [24]. Our structure has  
261 also unexpectedly consisted with this conclusion. Furthermore, we propose

262 that the structural evolution of SADS-CoV S1-NTD is more likely to located  
263 between the other  $\alpha$ -CoVs,  $\delta$ -CoVs and  $\gamma$ -CoVs.

264 For the CTDs, despite there are dramatic sequential differences between  
265 SADS-CoV S1-CTD and other CTDs, all of them share the similar structural  
266 topology [24] (**Fig. 2N-R**). Unlike the other CTDs of  $\alpha$ -CoVs and  $\delta$ -CoVs which  
267 have a more compact core  $\beta$ -sandwich structure containing two  $\beta$ -sheet layers,  
268 our CTD resembles the  $\gamma$ - and  $\beta$ -CoVs which just has one layer  $\beta$ -sheet and  
269 several  $\alpha$ -helix and coil structures with a loose packing (**Fig. 2N-R**). Based on  
270 the structural comparison of the CTDs of all the four genera, all the other  
271  $\alpha$ -CoVs and  $\delta$ -CoVs use the loops which located on the top of the  $\beta$ -sandwich  
272 of CTDs as its receptor binding motif (RBM). As a result, we propose that  
273 SADS-CoV also uses these loops on the CTD as its RBM (**Fig. 2N-P**).  
274 Moreover, the CTDs of  $\gamma$ -CoVs evolves to get extended loops and the  $\beta$ -CoVs  
275 obtains an insertion domain which contains RBM under the host immune  
276 pressure, these receptor-binding moieties also located on the top of core  
277 domain (**Fig. 2Q-R**). Previous studies have shown that the core structures are  
278 two layers  $\beta$ -sandwiches for  $\alpha$ - and  $\delta$ -CoVs CTDs, weakened  $\beta$ -sandwiches  
279 for  $\gamma$ -CoVs CTDs, and single  $\beta$ -sheet layer for  $\beta$ -CoVs CTDs. The RBMs are  
280 three short discontinuous loops for  $\alpha$ - and  $\delta$ -CoVs CTDs, two reinforced loops  
281 for  $\gamma$ -CoVs CTDs, and a single continuous insertion domain for  $\beta$ -CoVs CTDs.  
282 The CTDs from different genera give an evolutionary spectrum, using  $\alpha$ - and  
283  $\delta$ -CoVs CTDs as ancestral,  $\gamma$ -CoVs CTDs as the transitional structure and



284  $\beta$ -CoVs CTDs the downstream structure, but the evolutionary direction could  
 285 go either way [24]. Hence, we propose that the SADS-CoV S1-CTD located  
 286 between the other  $\alpha$ -,  $\delta$ -CoVs and  $\beta$ -CoVs CTDs on the evolutionary spectrum  
 287 (Fig. 2N-R).

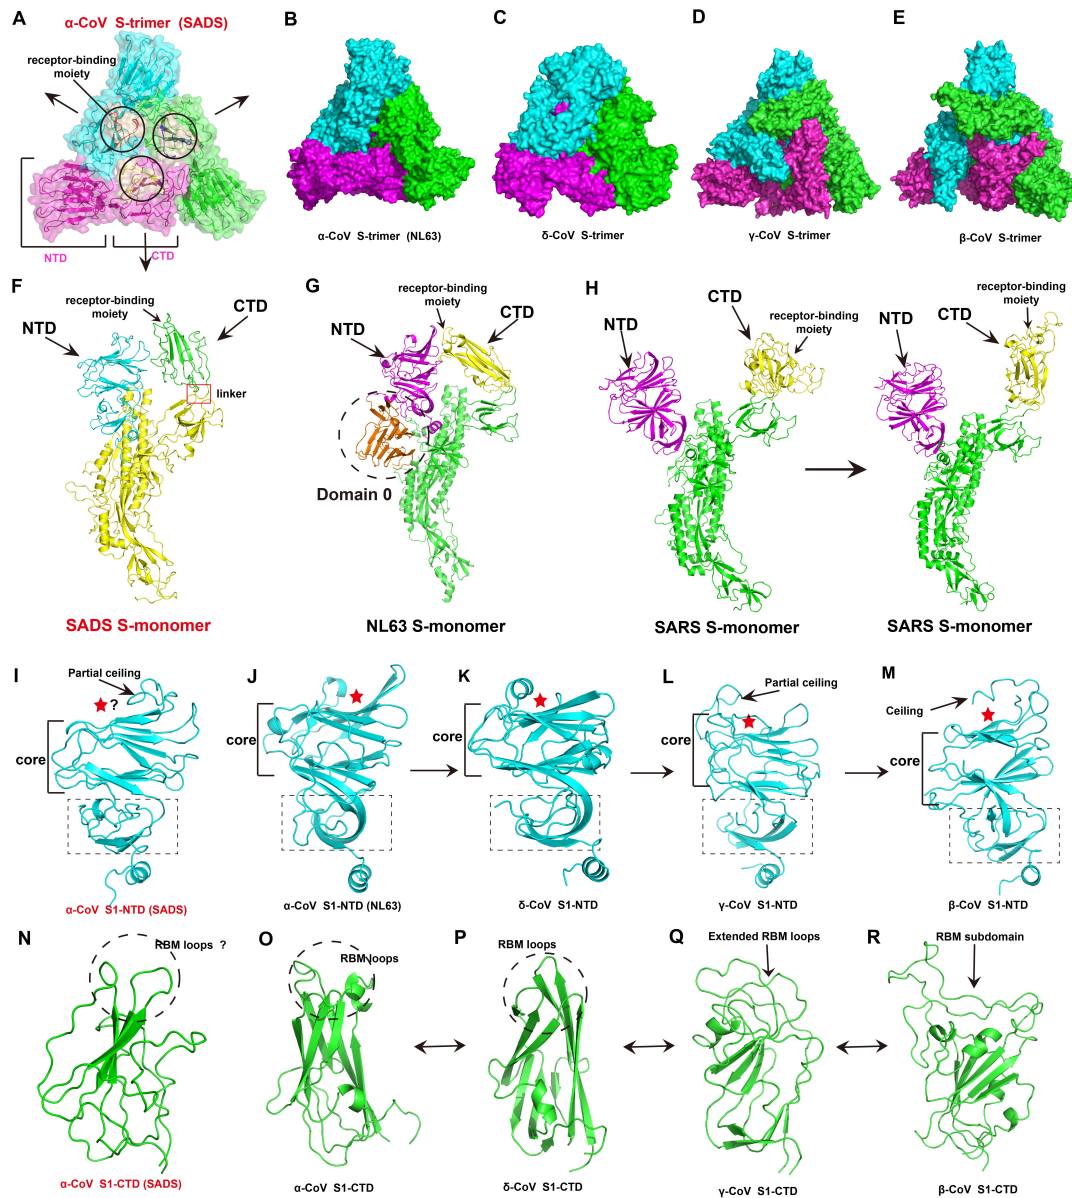

288

289 **Fig. 2. Structural evolution of coronavirus spike protein.**

290 (A). Architecture of the SADS-CoV S1 subunit. Three subunits are shown as  
 291 different colors, one of the NTD and CTD are indicated as magenta, the

292 receptor-binding moieties are shown as wheat and indicated by cycles.

293 (B-E). Architecture of the four coronavirus genera S subunit. (B):  $\alpha$ -CoVs  
294 S-trimer, NL63-CoV, PDB: 5SZS; (C)  $\delta$ -CoVs S-trimer, PdCoV, PDB: 6BFU;  
295  $\gamma$ -CoVs S-trimer, IBV, PDB: 6CV0;  $\beta$ -CoVs S-trimer, SARS-CoV, PDB: 5X58.

296 (F). Structures of S1 monomer from SADS-CoV. The linker between the CTD  
297 and SD1 is indicated by a red frame. The NTD, CTD and receptor-binding  
298 moiety are indicated by black arrow, respectively.

299 (G). Structures of S1 monomer from NL63-CoV, the additional domain 0 is  
300 indicated by a dotted cycle.

301 (H). Structures of S1 monomer from SARS-CoV. The left panel shows the S1  
302 subunit in a “lying down” state, while the right panel shows the S1 subunit in a  
303 “stand up” state. The conformational change of the subunits from “lying down”  
304 to “stand up” help the trimer to expose receptor-binding moieties and then  
305 switch inactive state to active state.

306 (I-M). Structures of NTDs from different genera. The core structures and  
307 subdomain (dotted rectangle) of NTDs are labeled, respectively. Partial ceiling  
308 and ceiling are indicated by black arrow. The sugar-binding site or putative  
309 sugar-binding site in sugar-binding NTDs are indicated by red star. (I):  
310 SADS-CoV S1-NTD; (J): NL63-CoV S1-NTD (PDB: 5SZS); (K): PdCoV  
311 S1-NTD (PDB: 6BFU); (L): IBV S1-NTD (PDB: 6CV0); (M): SARS-CoV  
312 S1-NTD (PDB: 5X58).

313 (N-R). Structures of CTDs from different genera. The RBM loops and putative



314 RBM loops are indicated by dotted cycles, while the extended RBM loops and  
315 RBM subdomain are indicated by black arrow. (N): SADS-CoV S1-CTD; (O):  
316 NL63-CoV S1-NTD (PDB: 5SZS); (P): PdCoV S1-CTD (PDB: 6BFU); (L): IBV  
317 S1-CTD (PDB: 6CV0); (M): SARS-CoV S1-CTD (PDB: 5X58).

318

### 319 **Structural alignment between the S of SADS-CoV, SARS-CoV and** 320 **SARS-CoV-2**

321 The phylogenetic analysis based on the whole genome and N gene of  
322 eight SADS-CoVs and other CoVs showed that all the sequence of  
323 SADS-CoVs clustered with bat coronavirus HKU2 to form a well defined  
324 branch and belong to the  $\alpha$ -genera [28]. However, interestingly, the  
325 phylogenetic analysis of the S genes showed that the S gene cluster can be  
326 divided into two groups:  $\alpha$ -CoV-1 and  $\alpha$ -CoV-2. All of the SADS-CoVs and bat  
327 coronavirus HKU2 belong to  $\alpha$ -CoV1 which group with the  $\beta$ -CoVs to form the  
328 half evolutionary branch of CoVs, whereas the other  $\alpha$ -CoVs cluster to the  
329  $\alpha$ -CoV-2 [28, 29]. The structural alignment of the SADS-CoV S trimer by Dali  
330 analysis (<http://ekhidna2.biocenter.helsinki.fi/dali/>) implies that SADS-CoV S  
331 has a relatively conservation with that of  $\beta$ -CoVs, as reflected by the generally  
332 high Z-scores and high RMSD (**Table S1**). In addition, the Dali analysis of CTD  
333 showed that SADS-CoV S CTD is relatively poorly conserved with  $\beta$ -CoVs, as  
334 reflected by the generally low Z-scores and high RMSD, although it shares  
335 roughly identical core folding with other  $\beta$ -CoVs, i.e., HKU9, SARS-CoV,

336 MERS-CoV, HKU1 and OC43 (**Table S2**). Taken together, these results are  
337 consistent with that of the sequence alignment.

338 Based on the phylogenetic analysis, we compared the CTDs of  
339 SADS-CoV, SARS-CoV and SARS-CoV-2 by the sequence and structure. The  
340 whole SADS-CoV S ectodomain is only approximately 30% sequence identity  
341 when compared with the SARS-CoV and SARS-CoV-2, which obstructs  
342 structural alignment between SADS-CoV, SARS-CoV and SARS-CoV-2.  
343 Especially there is no significant homologous CoV S CTD found in the PDB  
344 when the SADS-CoV S CTD sequence as the inquiry. Interestingly, the  
345 SADS-CoV S CTD is smaller (about 130 residues) than other CoV CTD (about  
346 170 residues) (**Fig. 3A**). To further investigate the differences between the S of  
347 SADS and other CoVs, and deduce the hypothesis of SADS pathogenic  
348 mechanisms, we focused on CTD and performed structural alignments using  
349 the complexes of CTD (SARS-CoV-2)-ACE2, CTD (SARS-CoV)-ACE2, CTD  
350 (NL63-CoV)-ACE2 (**Fig. 3B-3D**) and the CTDs of SARS-CoV-2, SARS-CoV  
351 and SADS-CoV (**Fig. 3E**). Surprisingly, although SARS-CoV-2, SARS-CoV  
352 and SADS-CoV CTD do not share significant sequence homology and belong  
353 to different family of CoVs (**Fig. 3A**), they share roughly identical organization  
354 and core folding (**Fig. 3E**). Notably, SADS-CoV uses the variant loop region as  
355 its RBM which is consist with the insertion domain of SARS-CoV and  
356 SARS-CoV-2 CTDs that is formed by two  $\beta$  sheets and several loops (**Fig. 3E**).  
357 Meanwhile, compared with the  $\beta$ -CoVs SARS-CoV-2 and SARS-CoV, the



372 (colored gray and purple) and SADS-CoV CTD (colored green). Red and  
373 purple ribbons indicate ACE2 binding motif (insertion domain).

374

### 375 **Immune evasion strategies by SADS-CoV S**

376 As a protein located on the surface of the virus, the spike proteins mediate  
377 viral entry into host cells and also undergo the immune pressure from the  
378 immune system of host at the same time. The structure of SADS-CoV S  
379 provides some hints on the immune evasion strategies of SADS-CoV.

380 On one hand, the SADS-CoV S has a classical compact structure as other  
381  $\alpha$ -CoVs, which uses the intra-subunit packing mode (**Fig. 2A-2B**). As a result,  
382 this kind of architecture can maximally reduce the surface area of the spike  
383 protein to the immune system. Moreover, all of the NTDs and CTDs in a “lay  
384 down” station (closed conformation) can further reduce immune pressure (**Fig.**  
385 **2F**). Nevertheless, the NTDs and CTDs still have the chance to expose for  
386 receptor binding. Furthermore, they can also be selected as single- or  
387 two-RBD system [30]. Based on the structural alignment of these structures,  
388 we speculate that SADS-CoV use the two-RBD system for which the NTD is  
389 used as the attachment receptor binding domain and the CTD is used as the  
390 protein receptor binding domain. Upon infecting host cells, S1-CTD would  
391 need to switch to an open conformation (“stand up”) to render the putative  
392 RBM loops accessible to the host receptor. This closed-to-open mechanism

393 can minimize the exposure of the putative RBM loops to the immune system  
394 [30].

395 On the other hand, as one of the immune evasion strategy, masking of  
396 epitopes by glycan shielding is usual in coronavirus evolution [31]. Our map  
397 shows that there are fifty N-linked glycans spreading over the surface of each  
398 S subunit. They are mainly located on the surface of S1 rather than on S2 like  
399 HCoV-NL63 (**Fig. 4A**). In contrast to that HCoV-NL63 S evades host immune  
400 surveillance mainly by glycan shielding its S2 epitopes, SADS-CoV spike  
401 appears to evade host immune surveillance mainly by glycan shielding its S1  
402 epitopes [31]. In addition, unlike the other  $\alpha$ -coronavirus and  $\delta$ -coronavirus  
403 whose putative sugar-binding sites are surrounded by glycans, most of the  
404 SADS-CoV N-linked glycosylation sites are located on the CTD (**Fig. 4A-4B**).  
405 As a result, the putative sugar-binding sites on the NTD are shielded, not by  
406 glycans, but by the partial ceiling-like structure on the top of the core structure.  
407 As a comparison, this feature is consistent with BCoV-S1-NTD [32]. Unlike the  
408 HCoV-NL63 receptor-binding residues interacting with domain A belonging to  
409 the same protomer, SADS-CoV CTD use a loop (residues 321-328) to  
410 interacting with NTD from the same S1. Both use an N-linked glycosylation  
411 (residue Asp358) to make them buried and not available to engage the host  
412 cell receptor (**Fig. 4C**) [31]. Taken together, SADS-CoV has several unique  
413 structural features that may facilitate viral immune evasion.

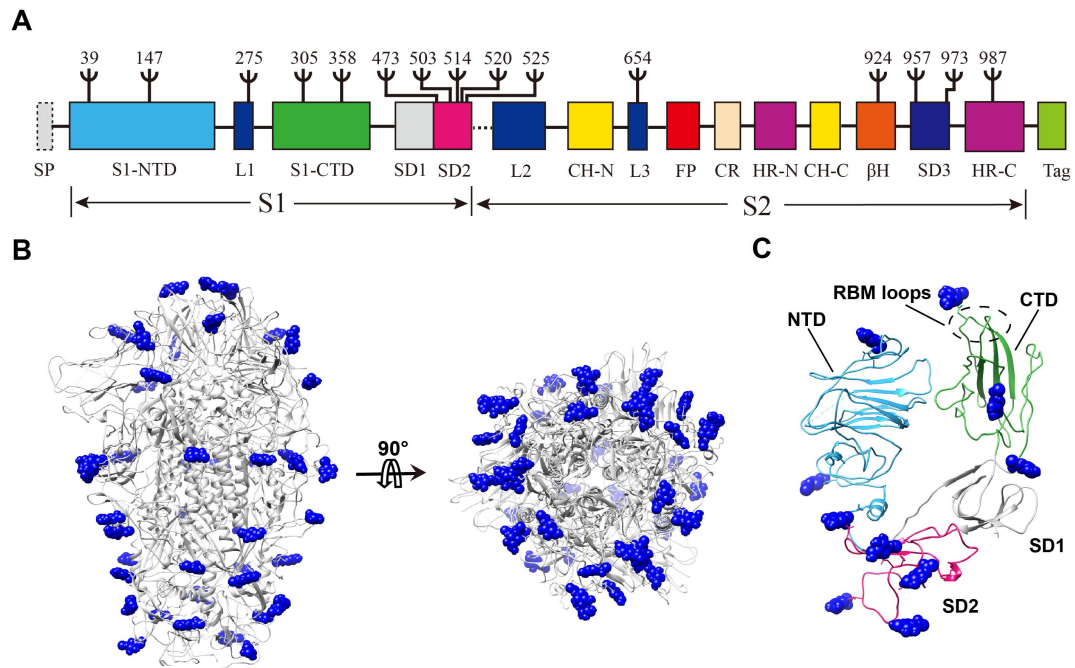

414

415 **Fig. 4. N-linked glycan distribution on surface of SARS-CoV S.**

416 (A). Distribution of observed N-linked glycosylation sites on the  
417 one-dimensional structure of SARS-CoV S.  $\Psi$  indicates N-linked glycosylation  
418 sites.

419 (B). Distribution of observed N-linked glycosylation sites on the  
420 three-dimensional structure of SARS-CoV S. Blue sphere indicates N-linked  
421 glycosylation sites.

422 (C). Distribution of observed N-linked glycosylation sites in monomeric S1  
423 (colored as panel A).

424

425 **Table 1. Data collection and refinement statistics.**

| <b>Dataset</b>                                   | <b>SADS-CoV S ectodomain</b> |
|--------------------------------------------------|------------------------------|
| <b>Data collection</b>                           |                              |
| EM equipment                                     | FEI Titan Krios              |
| Voltage (kV)                                     | 300                          |
| Detector                                         | K2 Summit                    |
| Pixel size (Å)                                   | 1.04                         |
| Electron dose (e <sup>-</sup> /Å <sup>2</sup> )  | 60                           |
| Defocus range (µm)                               | -1.8 ~ -2.5                  |
| <b>Reconstruction</b>                            |                              |
| Software                                         | RELION 3.0                   |
| Particle Numbers                                 | 35,000                       |
| Symmetry                                         | C3                           |
| FSC threshold                                    | 0.143                        |
| Final resolution (Å)                             | 3.55                         |
| Map-sharpening <i>B</i> factor (Å <sup>2</sup> ) | -152                         |
| <b>Model building</b>                            |                              |
| Software                                         | Coot 0.8.9                   |
| <b>Refinement</b>                                |                              |
| Software                                         | Phenix-1.18rc1               |
| CC_mask                                          | 0.78                         |
| Bond lengths (Å)                                 | 0.007                        |
| Bond angles (°)                                  | 1.389                        |
| <b>Validation</b>                                |                              |
| Clashscore                                       | 5.90                         |
| Rotamers outliers (%)                            | 1.57                         |
| <b>Ramachandran plot</b>                         |                              |
| Favored (%)                                      | 89.85                        |
| Allowed (%)                                      | 8.89                         |
| Outliers (%)                                     | 1.26                         |

426

427

428

429

## 430 **Methods**

### 431 **Protein expression and purification**

432 SADS-CoV spike glycoprotein (virus strain GDS04; GenBank No.:  
433 ASK51717.1) gene was synthesized with codons optimized and inserted into  
434 pFastBac vector (Life Technologies Inc.). The ectodomain of SADS-CoV spike  
435 protein without the transmembrane anchor and intracellular tail (residues  
436 18-1068) was expressed by Bac-to-Bac insect cell system (Invitrogen). To get  
437 the trimer ectodomain protein, we added a GCN4 trimerization tag followed by  
438 a TEV cleavage site and an 8×His-tag at the C terminal of spike protein. The  
439 cells were harvested by centrifugation at 4,000×g and remove the cells, then  
440 the supernatant was loaded to Ni-NTA (Nitrilotriacetic acid) resin (Invitrogen)  
441 affinity-purified by the C-terminal 8×His-tag. Spike protein was finally purified  
442 using Superose 6 HR10/300 column (GE Healthcare) pre-equilibrated with  
443 buffer containing 20 mM HEPES (pH 7.5) and 150 mM NaCl, 1 mM DTT and  
444 concentrated with a centrifugal filter (Amicon Ultra) to approximately 1 mg/ml  
445 and divided into aliquots, flash frozen in liquid nitrogen.

### 446 **Cryo-EM sample preparation and data acquisition**

447 Purified spike protein was diluted to 0.63 mg ml<sup>-1</sup> with buffer containing 20 mM  
448 HEPES pH 7.5, 100 mM NaCl and 2 mM DTT. A 4 µl volume of sample was  
449 applied to glow-discharged Quantifoil copper grid and vitrified by plunge  
450 freezing in a liquid ethane using a Vitrobot Mark with a blotting time of 3 s.  
451 Data collection was performed on a Titan Krios microscope operated at 300 kV



452 and equipped with a field emission gun, a Gatan GIF Quantum energy filter  
453 and a Gatan K2 Summit direct electron camera in super-resolution mode, at  
454 CBI-IBP. The calibrated magnification was 130,000 $\times$  in EF TEM mode,  
455 corresponding to a pixel size of 1.04 Å. The automated software SerialEM was  
456 used to collect 1,000 movies at a defocus range of between 1.8 and 2.3  $\mu\text{m}$ .  
457 Each exposure (10 s exposure time) comprised 32 sub-frames amounting to a  
458 total dose of 60 electrons Å<sup>-2</sup> s<sup>-1</sup>.

### 459 **Image processing**

460 Micrograph movie stacks were corrected for beam-induced motion using  
461 MotionCor2 [33]. The contrast transfer function parameters for each dose  
462 weighting image were determined with Gctf [34]. Particles were initially auto  
463 picked with Gautomatch without template and extracted with a 256-pixel by  
464 256-pixel box. Reference-free 2D-class average was performed using RELION  
465 [35], and the well-resolved 2D averages were subjected to another iteration  
466 particle auto picking as template with Gautomatch. After iterative 2D-class  
467 average in RELION, only particles with best-resolved 2D averages were  
468 selected for initial model generation and 3D classification using RELION. The  
469 classes with identical detailed features were merged for further  
470 auto-refinement with a sphere mask, and post processed with 3-pixel  
471 extension and 3-pixel fall-off around the entire molecule, to produce the final  
472 density map with an overall resolution of 3.55 Å. Chimera and PyMOL  
473 (<https://pymol.org/>) were used for graphical visualization [36].

474 **Model building**

475 *Ab initio* modelling of the spike protein was performed in Coot [37], using  
476 structure predictions calculated by Phyre2 [38], the partial structure modeled  
477 by EMBuilder [39], and the reference model (PDB: 5X58). Map refinement was  
478 carried out using Phenix.real\_space\_refine [40], with secondary structure and  
479 Ramachandran restraints. Cryo-EM data collection, refinement and validation  
480 statistics were listed in Table 1.

481

482 **ACCESSION NUMBER**

483 The Cryo-EM structure of SADS-CoV S has been deposited into EMDB with  
484 accession numbers of EMD-30071. Coordinates and structure factors have  
485 been deposited in the Protein Data Bank (PDB) under accession number  
486 6M39.

487

488 **Acknowledgements**

489 S.O was funded by National Natural Science Foundation of China grants  
490 (31770948, and 31570875) (S.O), The high-level personnel introduction grant  
491 of Fujian Normal University (Z0210509), Special Funds of the Central  
492 Government Guiding Local Science and Technology Development  
493 (2017L3009); P.Z was funded by National Natural Science Foundation of  
494 China grants (31425007, 31730023), grants from the Chinese Ministry of  
495 Science and Technology (2015CB856200, 2017YFA0504700), Strategic

496 Priority Research Program from Chinese Academy of Sciences  
497 (XDB08010100); H.G was funded by National Natural Science Foundation of  
498 China grants (31900879), Natural Science Foundation of Fujian province  
499 grants (2019J05064).

500

501 **Competing interests:** The authors have declared that no competing interests  
502 exist.

503

504 **AUTHOR CONTRIBUTIONS**

505

506

507

## 508 **References**

- 509 1. Zhu N, Zhang D, Wang W, Li X, Yang B, Song J, et al. A novel coronavirus from  
510 patients with pneumonia in China, 2019. *New England Journal of Medicine*. 2020.
- 511 2. Zhou P, Fan H, Lan T, Yang X-L, Shi W-F, Zhang W, et al. Fatal swine acute  
512 diarrhoea syndrome caused by an HKU2-related coronavirus of bat origin. *Nature*.  
513 2018;556(7700):255-8.
- 514 3. Zhou P, Yang X-L, Wang X-G, Hu B, Zhang L, Zhang W, et al. A pneumonia  
515 outbreak associated with a new coronavirus of probable bat origin. *Nature*. 2020. doi:  
516 10.1038/s41586-020-2012-7.
- 517 4. Fehr AR, Perlman S. Coronaviruses: an overview of their replication and  
518 pathogenesis. *Coronaviruses*: Springer; 2015. p. 1-23.
- 519 5. Shang J, Zheng Y, Yang Y, Liu C, Geng Q, Tai W, et al. Cryo-electron microscopy  
520 structure of porcine deltacoronavirus spike protein in the prefusion state. *Journal of*  
521 *virology*. 2018;92(4):e01556-17.
- 522 6. De Groot R, Baker S, Baric R, Enjuanes L, Gorbalenya A, Holmes K, et al.  
523 *Family coronaviridae*. 2012:806-28.
- 524 7. Woo PC, Lau SK, Lam CS, Lau CC, Tsang AK, Lau JH, et al. Discovery of seven  
525 novel mammalian and avian coronaviruses in Deltacoronavirus supports bat  
526 coronaviruses as the gene source of Alphacoronavirus and Betacoronavirus and avian  
527 coronaviruses as the gene source of Gammacoronavirus and Deltacoronavirus.  
528 2012:JVI. 06540-11.
- 529 8. Song W, Gui M, Wang X, Xiang YJpp. Cryo-EM structure of the SARS  
530 coronavirus spike glycoprotein in complex with its host cell receptor ACE2.  
531 2018;14(8):e1007236.
- 532 9. Coleman CM, Frieman MBJJov. Coronaviruses: important emerging human  
533 pathogens. 2014;88(10):5209-12.
- 534 10. Graham RL, Baric RS. Recombination, reservoirs, and the modular spike:  
535 mechanisms of coronavirus cross-species transmission. *Journal of virology*.  
536 2010;84(7):3134-46.
- 537 11. Cui J, Li F, Shi Z-L. Origin and evolution of pathogenic coronaviruses. *Nature*  
538 *reviews Microbiology*. 2019;17(3):181-92.
- 539 12. Zhou P, Fan H, Lan T, Yang X-L, Shi W-F, Zhang W, et al. Fatal swine acute  
540 diarrhoea syndrome caused by an HKU2-related coronavirus of bat origin.  
541 2018;556(7700):255.
- 542 13. Pan Y, Tian X, Qin P, Wang B, Zhao P, Yang Y-L, et al. Discovery of a novel  
543 swine enteric alphacoronavirus (SeACoV) in southern China. 2017;211:15-21.
- 544 14. Fehr AR, Perlman S. Coronaviruses: an overview of their replication and  
545 pathogenesis. *Methods Mol Biol*. 2015;1282:1-23. doi:  
546 10.1007/978-1-4939-2438-7\_1. PubMed PMID: 25720466.
- 547 15. Du L, He Y, Zhou Y, Liu S, Zheng B-J, Jiang S. The spike protein of  
548 SARS-CoV—a target for vaccine and therapeutic development. *Nature Reviews*  
549 *Microbiology*. 2009;7(3):226-36.
- 550 16. Li FJArov. Structure, function, and evolution of coronavirus spike proteins.  
551 2016;3:237-61.

- 552 17. Kirchdoerfer RN, Wang N, Pallesen J, Wrapp D, Turner HL, Cottrell CA, et al.  
553 Stabilized coronavirus spikes are resistant to conformational changes induced by  
554 receptor recognition or proteolysis. *Sci Rep.* 2018;8(1):15701. doi:  
555 10.1038/s41598-018-34171-7. PubMed PMID: 30356097; PubMed Central PMCID:  
556 PMC6200764.
- 557 18. Yuan Y, Cao D, Zhang Y, Ma J, Qi J, Wang Q, et al. Cryo-EM structures of  
558 MERS-CoV and SARS-CoV spike glycoproteins reveal the dynamic receptor binding  
559 domains. *Nat Commun.* 2017;8:15092. doi: 10.1038/ncomms15092. PubMed PMID:  
560 28393837; PubMed Central PMCID: PMC65394239.
- 561 19. Wrapp D, Wang N, Corbett KS, Goldsmith JA, Hsieh CL, Abiona O, et al.  
562 Cryo-EM structure of the 2019-nCoV spike in the prefusion conformation. *Science.*  
563 2020. doi: 10.1126/science.abb2507. PubMed PMID: 32075877.
- 564 20. Song W, Gui M, Wang X, Xiang Y. Cryo-EM structure of the SARS coronavirus  
565 spike glycoprotein in complex with its host cell receptor ACE2. *PLoS Pathog.*  
566 2018;14(8):e1007236. doi: 10.1371/journal.ppat.1007236. PubMed PMID: 30102747;  
567 PubMed Central PMCID: PMC6107290.
- 568 21. Lu R, Zhao X, Li J, Niu P, Yang B, Wu H, et al. Genomic characterisation and  
569 epidemiology of 2019 novel coronavirus: implications for virus origins and receptor  
570 binding. *The Lancet.* 2020.
- 571 22. Matsuyama S, Nagata N, Shirato K, Kawase M, Takeda M, Taguchi F. Efficient  
572 activation of the severe acute respiratory syndrome coronavirus spike protein by the  
573 transmembrane protease TMPRSS2. *Journal of virology.* 2010;84(24):12658-64.
- 574 23. Wrapp D, McLellan JS. The 3.1-Angstrom Cryo-electron Microscopy Structure  
575 of the Porcine Epidemic Diarrhea Virus Spike Protein in the Prefusion Conformation.  
576 *J Virol.* 2019;93(23). doi: 10.1128/JVI.00923-19. PubMed PMID: 31534041; PubMed  
577 Central PMCID: PMC6854500.
- 578 24. Shang J, Zheng Y, Yang Y, Liu C, Geng Q, Luo C, et al. Cryo-EM structure of  
579 infectious bronchitis coronavirus spike protein reveals structural and functional  
580 evolution of coronavirus spike proteins. *PLoS Pathog.* 2018;14(4):e1007009. doi:  
581 10.1371/journal.ppat.1007009. PubMed PMID: 29684066; PubMed Central PMCID:  
582 PMC65933801.
- 583 25. Gui M, Song W, Zhou H, Xu J, Chen S, Xiang Y, et al. Cryo-electron microscopy  
584 structures of the SARS-CoV spike glycoprotein reveal a prerequisite conformational  
585 state for receptor binding. *Cell Res.* 2017;27(1):119-29. doi: 10.1038/cr.2016.152.  
586 PubMed PMID: 28008928; PubMed Central PMCID: PMC5223232.
- 587 26. Walls AC, Xiong X, Park YJ, Tortorici MA, Snijder J, Quispe J, et al. Unexpected  
588 Receptor Functional Mimicry Elucidates Activation of Coronavirus Fusion. *Cell.*  
589 2019;176(5):1026-39 e15. doi: 10.1016/j.cell.2018.12.028. PubMed PMID: 30712865;  
590 PubMed Central PMCID: PMC6751136.
- 591 27. de Jong DH, Singh G, Bennett WF, Arnarez C, Wassenaar TA, Schafer LV, et al.  
592 Improved Parameters for the Martini Coarse-Grained Protein Force Field. *J Chem*  
593 *Theory Comput.* 2013;9(1):687-97. Epub 2013/01/08. doi: 10.1021/ct300646g.  
594 PubMed PMID: 26589065.
- 595 28. Zhou L, Sun Y, Lan T, Wu R, Chen J, Wu Z, et al. Retrospective detection and

- 596 phylogenetic analysis of swine acute diarrhoea syndrome coronavirus in pigs in  
597 southern China. *Transbound Emerg Dis.* 2019;66(2):687-95. doi: 10.1111/tbed.13008.  
598 PubMed PMID: 30171801.
- 599 29. Pan Y, Tian X, Qin P, Wang B, Zhao P, Yang YL, et al. Discovery of a novel  
600 swine enteric alphacoronavirus (SeACoV) in southern China. *Vet Microbiol.*  
601 2017;211:15-21. doi: 10.1016/j.vetmic.2017.09.020. PubMed PMID: 29102111.
- 602 30. Shang J, Zheng Y, Yang Y, Liu C, Geng Q, Tai W, et al. Cryo-Electron  
603 Microscopy Structure of Porcine Deltacoronavirus Spike Protein in the Prefusion  
604 State. *J Virol.* 2018;92(4). doi: 10.1128/JVI.01556-17. PubMed PMID: 29070693;  
605 PubMed Central PMCID: PMC5790952.
- 606 31. Walls AC, Tortorici MA, Frenz B, Snijder J, Li W, Rey FA, et al. Glycan shield  
607 and epitope masking of a coronavirus spike protein observed by cryo-electron  
608 microscopy. *Nat Struct Mol Biol.* 2016;23(10):899-905. doi: 10.1038/nsmb.3293.  
609 PubMed PMID: 27617430; PubMed Central PMCID: PMC5515730.
- 610 32. Peng G, Xu L, Lin YL, Chen L, Pasquarella JR, Holmes KV, et al. Crystal  
611 structure of bovine coronavirus spike protein lectin domain. *J Biol Chem.*  
612 2012;287(50):41931-8. doi: 10.1074/jbc.M112.418210. PubMed PMID: 23091051;  
613 PubMed Central PMCID: PMC3516740.
- 614 33. Zheng SQ, Palovcak E, Armache JP, Verba KA, Cheng Y, Agard DA. MotionCor2:  
615 anisotropic correction of beam-induced motion for improved cryo-electron  
616 microscopy. *Nat Methods.* 2017;14(4):331-2. doi: 10.1038/nmeth.4193. PubMed  
617 PMID: 28250466; PubMed Central PMCID: PMC5494038.
- 618 34. Zhang K. Gctf: Real-time CTF determination and correction. *J Struct Biol.*  
619 2016;193(1):1-12. doi: 10.1016/j.jsb.2015.11.003. PubMed PMID: 26592709;  
620 PubMed Central PMCID: PMC4711343.
- 621 35. Zivanov J, Nakane T, Forsberg BO, Kimanius D, Hagen WJ, Lindahl E, et al.  
622 New tools for automated high-resolution cryo-EM structure determination in  
623 RELION-3. *Elife.* 2018;7. doi: 10.7554/eLife.42166. PubMed PMID: 30412051;  
624 PubMed Central PMCID: PMC6250425.
- 625 36. Pettersen EF, Goddard TD, Huang CC, Couch GS, Greenblatt DM, Meng EC, et  
626 al. UCSF Chimera--a visualization system for exploratory research and analysis. *J*  
627 *Comput Chem.* 2004;25(13):1605-12. doi: 10.1002/jcc.20084. PubMed PMID:  
628 15264254.
- 629 37. Emsley P, Cowtan K. Coot: model-building tools for molecular graphics. *Acta*  
630 *Crystallogr D Biol Crystallogr.* 2004;60(Pt 12 Pt 1):2126-32. doi:  
631 10.1107/S09074444904019158. PubMed PMID: 15572765.
- 632 38. Kelley LA, Mezulis S, Yates CM, Wass MN, Sternberg MJ. The Phyre2 web  
633 portal for protein modeling, prediction and analysis. *Nat Protoc.* 2015;10(6):845-58.  
634 doi: 10.1038/nprot.2015.053. PubMed PMID: 25950237; PubMed Central PMCID:  
635 PMC5298202.
- 636 39. Zhou N, Wang H, Wang J. EMBUILDER: A Template Matching-based Automatic  
637 Model-building Program for High-resolution Cryo-Electron Microscopy Maps. *Sci*  
638 *Rep.* 2017;7(1):2664. doi: 10.1038/s41598-017-02725-w. PubMed PMID: 28572576;  
639 PubMed Central PMCID: PMC5453991.

640 40. Adams PD, Afonine PV, Bunkoczi G, Chen VB, Davis IW, Echols N, et al.  
641 PHENIX: a comprehensive Python-based system for macromolecular structure  
642 solution. *Acta Crystallogr D Biol Crystallogr.* 2010;66(Pt 2):213-21. doi:  
643 10.1107/S0907444909052925. PubMed PMID: 20124702; PubMed Central PMCID:  
644 PMC2815670.

645

646

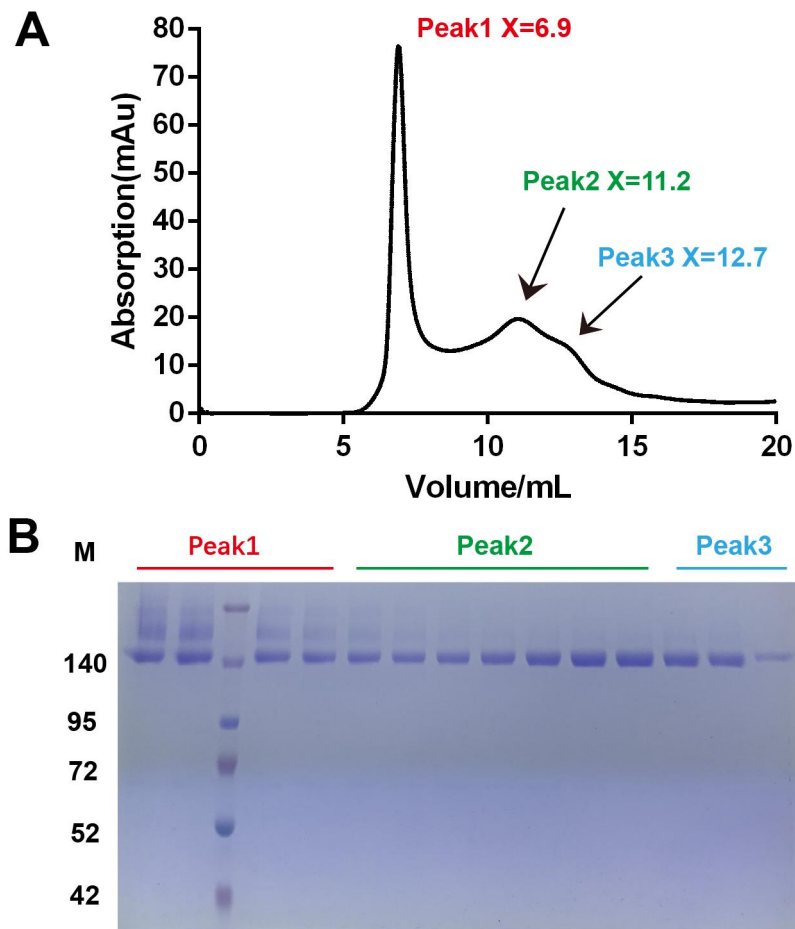

647

648 **Fig. S1. Expression and purification of SADS-CoV S.**

649 A. The size-exclusion chromatogram (SEC) of SADS-CoV S gives three peaks  
650 and the elution volumes of which are indicated by red, green and cyan,  
651 respectively. Data from a Superose 6 10/300 column are shown in black line.

652 B. The samples from different peaks were checked by SDS-PAGE analysis  
653 and the sample from peak 2 (green) is used to further analyze.

654



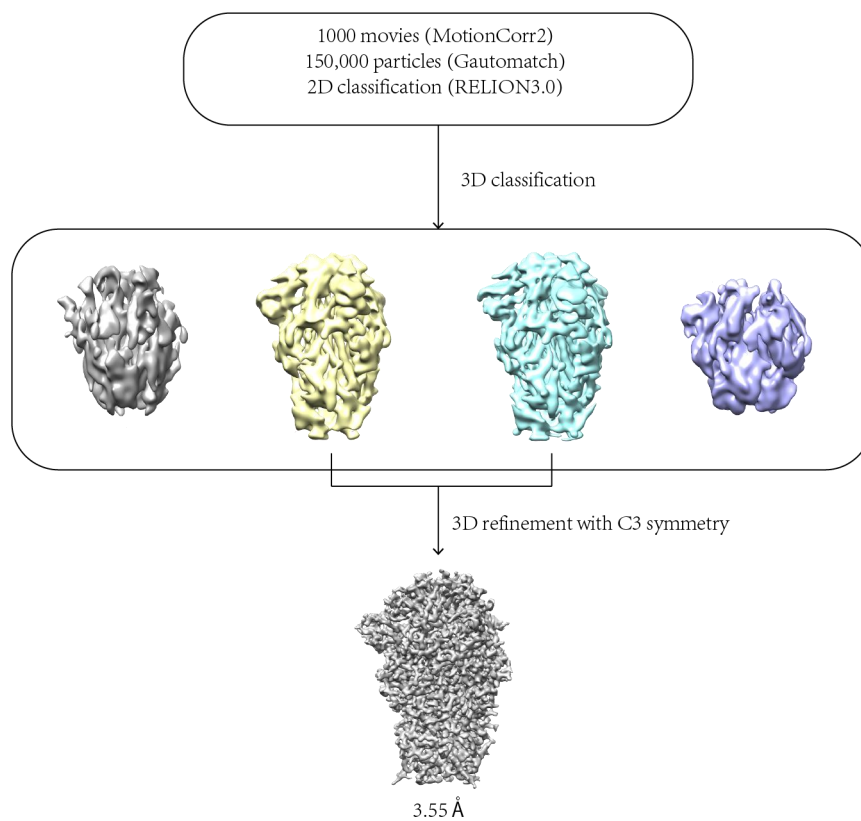

655

656 **Fig. S2. Cryo-EM data processing flow chart of SADS-CoV S.**

657

658

659

660

661

662

663

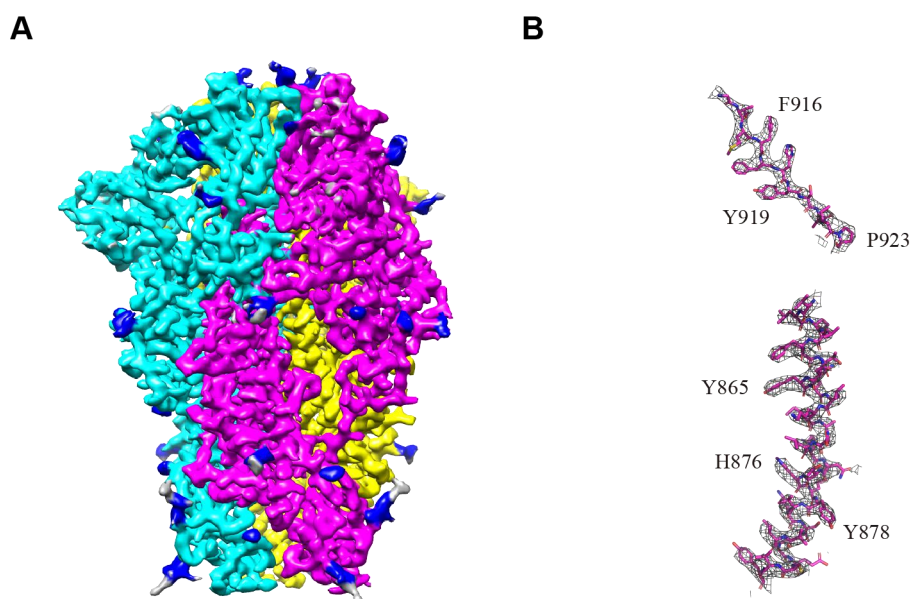

664

665 **Fig. S3. SADS-CoV S structure cryo-EM map (A) and representative**  
666 **density (B).** Map is colored by protomer and blue density indicates observed  
667 glycosylation sites.

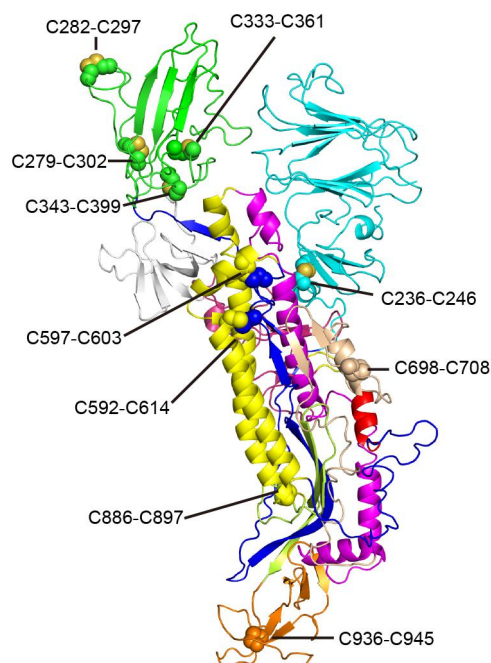

668

669 **Fig. S4. The distribution of 10 pairs disulfide bond on each subunit**  
670 **(236-246, 287-292, 279-302, 343-399, 333-361, 592-614, 597-603, 698-708,**  
671 **886-897, 936-945).**

672

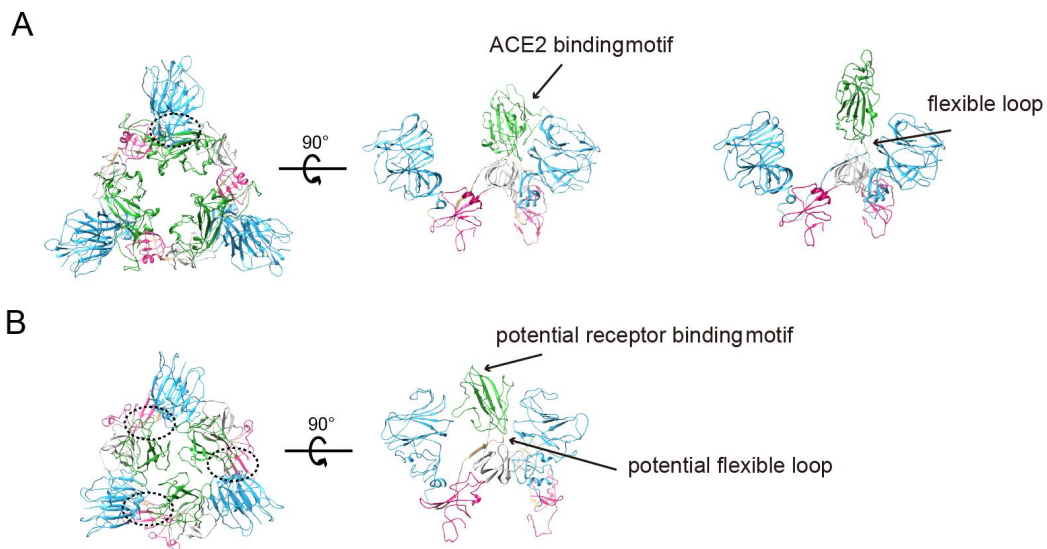

673

674 **Fig. S5. Structural comparison between SARS-CoV spike S1 domain (A)**  
675 **and SADS-CoV spike S1 domain (B).**

676 S1-NTD, S1-CTD, SD1 and SD2 are colored by cyan, green, gray and red,  
677 respectively. In native state, only interactions between S1-CTD and S1-NTD of  
678 neighbor monomer are visible in SARS-CoV S (dotted circle in panel A).  
679 S1-CTD is dissociated from S1-trimer when binding ACE2 in prefusion state.  
680 While in SADS-CoV spike, three interaction regions are visible in native state  
681 (dotted circles in panel B), including S1-CTD and S1-NTD of neighbor  
682 monomer, internal S1-CTD and S1-NTD, S1-CTD trimer.

683

684

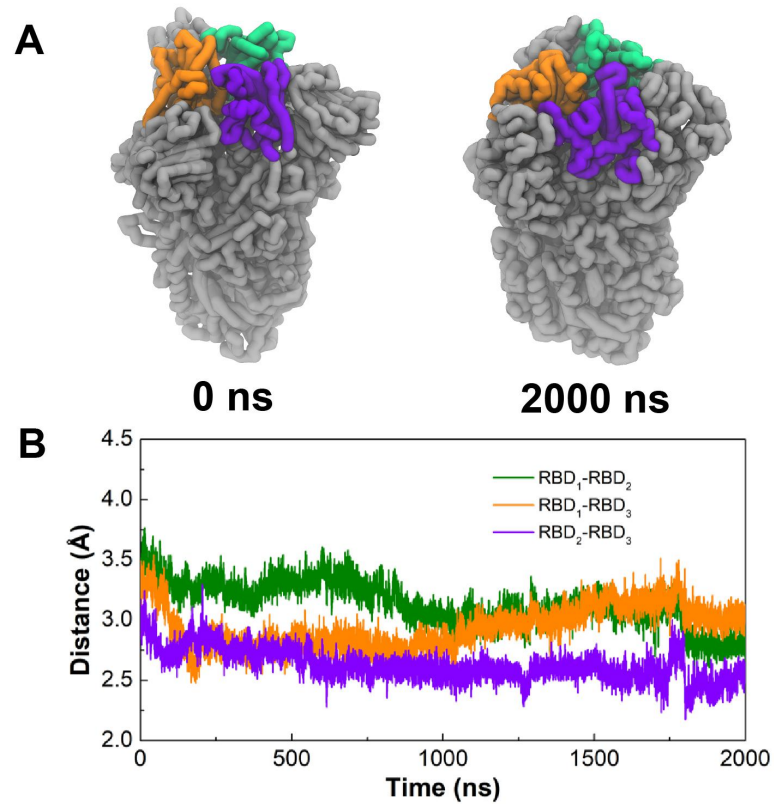

685

686

687 **Fig. S6. Molecular dynamics of simulations on SARS-CoV S trimer.**

688 (A) The initial and final coarse-grained models of SARS-CoV S trimer from the  
689 simulations. The three RBDs were highlighted in green, orange and purple,  
690 respectively.

691 (B) The center-of-mass distances between each two RBDs in the simulations.

692

693

694

695

696

697 **Table S1. The results of SADS-CoV S structure comparison by Dali**  
698 **service.**

---

| No | PDB ID-<br>Chain | Z Score | RMSD | Description                                                                                |
|----|------------------|---------|------|--------------------------------------------------------------------------------------------|
| 1  | 6nb4-A           | 28.6    | 4.6  | MERS-CoV S complex with human neutralizing LCA60 antibody Fab fragment (state 2)           |
| 2  | 6nzk-A           | 27.4    | 5.4  | Human coronavirus OC43 attachment to sialic acid receptors                                 |
| 3  | 5xlr-A           | 26.2    | 5.0  | Structure of SARS-CoV spike glycoprotein                                                   |
| 4  | 6cs2-B           | 25.6    | 7.5  | SARS Spike Glycoprotein - human ACE2 complex, Stabilized variant, all ACE2-bound particles |
| 5  | 6cv0-A           | 25.3    | 6.3  | Cryo-electron microscopy structure of infectious bronchitis coronavirus spike protein      |
| 6  | 6jx7-A           | 25.1    | 7.4  | Cryo-EM structure of spike protein of feline infectious peritonitis virus (strain UU4)     |
| 7  | 5x59-B           | 24.9    | 6.1  | Prefusion structure of MERS-CoV spike glycoprotein, three-fold symmetry                    |
| 8  | 5i08-A           | 22.9    | 4.4  | Prefusion structure of a human coronavirus HKU1 (isolate N5) spike protein                 |

---

699

700

701

702

703

704 **Table S2. The results of SADS-CoV S RBD structure comparison by Dali**  
705 **service.**

---

| No | PDB ID-<br>Chain | Z score | RMSD | Description                                                                                                                  |
|----|------------------|---------|------|------------------------------------------------------------------------------------------------------------------------------|
| 1  | 5gyq-A           | 6.8     | 2.9  | Putative receptor-binding domain (RBD) of bat-derived coronavirus HKU9 spike protein                                         |
| 2  | 6cs2-B           | 3.4     | 3.3  | SARS Spike Glycoprotein - human ACE2 complex, Stabilized variant, all ACE2-bound particles                                   |
| 3  | 5x59-B           | 7.0     | 3.2  | Prefusion structure of MERS-CoV (isolate United Kingdom/H123990006/2012) spike glycoprotein, three-fold symmetry             |
| 4  | 5xlr-A           | 5.7     | 3.4  | Structure of SARS-CoV spike glycoprotein                                                                                     |
| 5  | 5i08-A           | 5.5     | 3.4  | Prefusion structure of a Human coronavirus HKU1 (isolate N5) spike protein                                                   |
| 6  | 6cv0-A           | 4.3     | 3.4  | Cryo-electron microscopy structure of infectious bronchitis coronavirus spike protein                                        |
| 7  | 6nzk-A           | 4.2     | 3.2  | Structural basis for Human coronavirus OC43 attachment to sialic acid receptors                                              |
| 8  | 6atk-E           | 3.2     | 3.1  | Crystal structure of the human coronavirus 229E spike protein receptor binding domain in complex with human aminopeptidase N |

---

706

707
